# Supplementary material for: Saccharibacteria (TM7), but not other bacterial taxa, are associated with childhood caries regardless of age in a South China population
Source: PeerJ journal article supplement (doi:10.7717/peerj.15605), 2023-06-26
Supplement: FigS2.pdf [file FigS2.pdf]

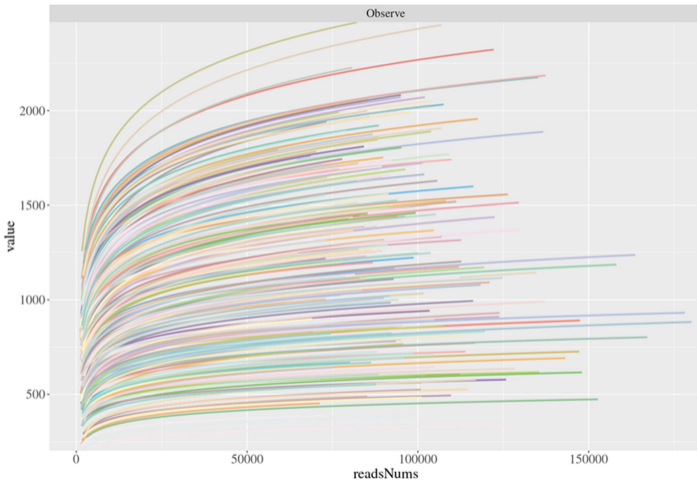

A

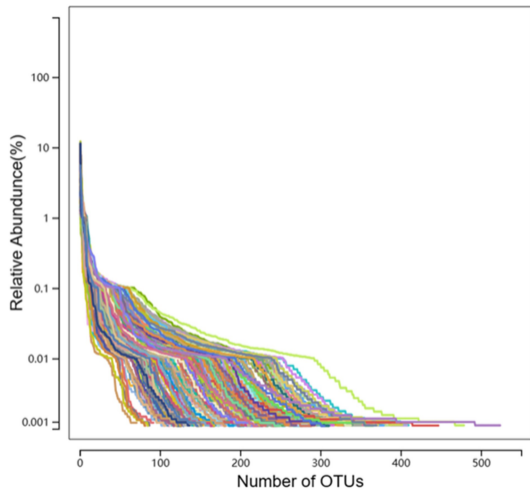

B
