# Supplementary material for: Saccharibacteria (TM7), but not other bacterial taxa, are associated with childhood caries regardless of age in a South China population
Source: PeerJ journal article supplement (doi:10.7717/peerj.15605), 2023-06-26

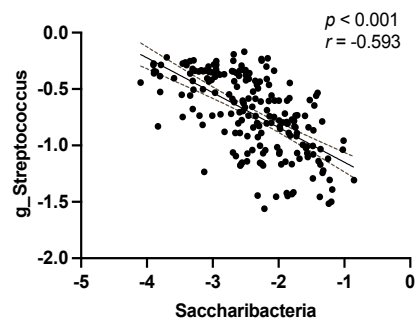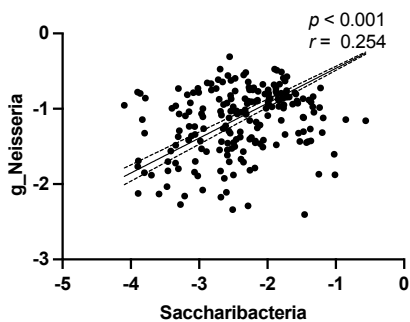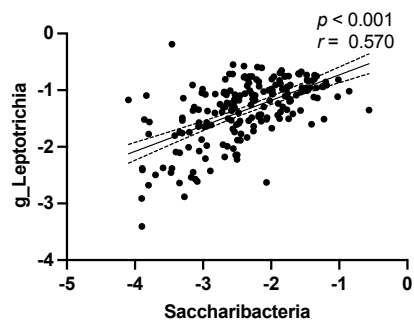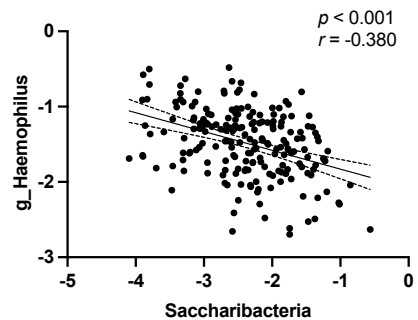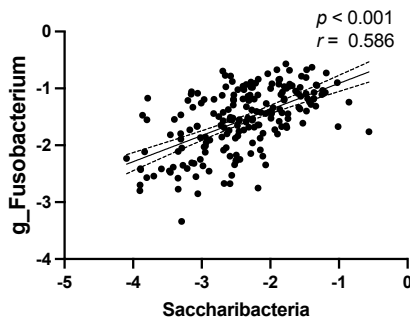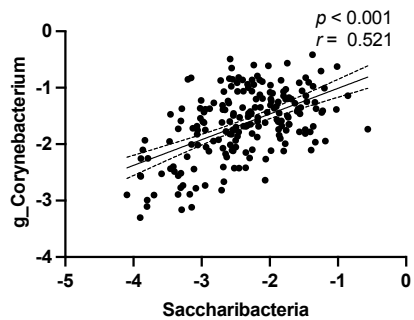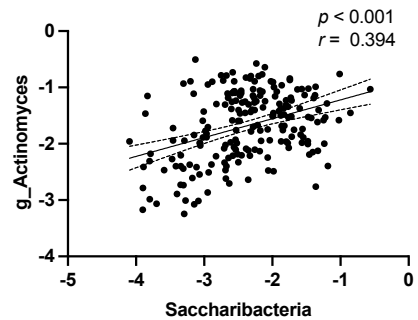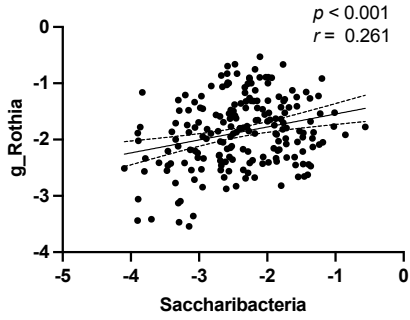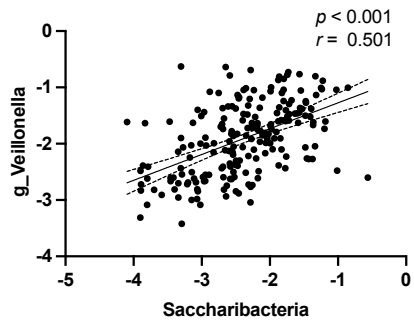

Supplement: FigS4.pdf [file FigS4.pdf]
